# Supplementary material for: Bronchoalveolar lavage fluid reveals factors contributing to the efficacy of PD-1 blockade in lung cancer
Source: JCI Insight. 2022 May 9;7(9):e157915. doi: 10.1172/jci.insight.157915 (PMC9090256; doi:10.1172/jci.insight.157915)
Supplement: Supplemental data [file jciinsight-7-157915-s289.pdf]

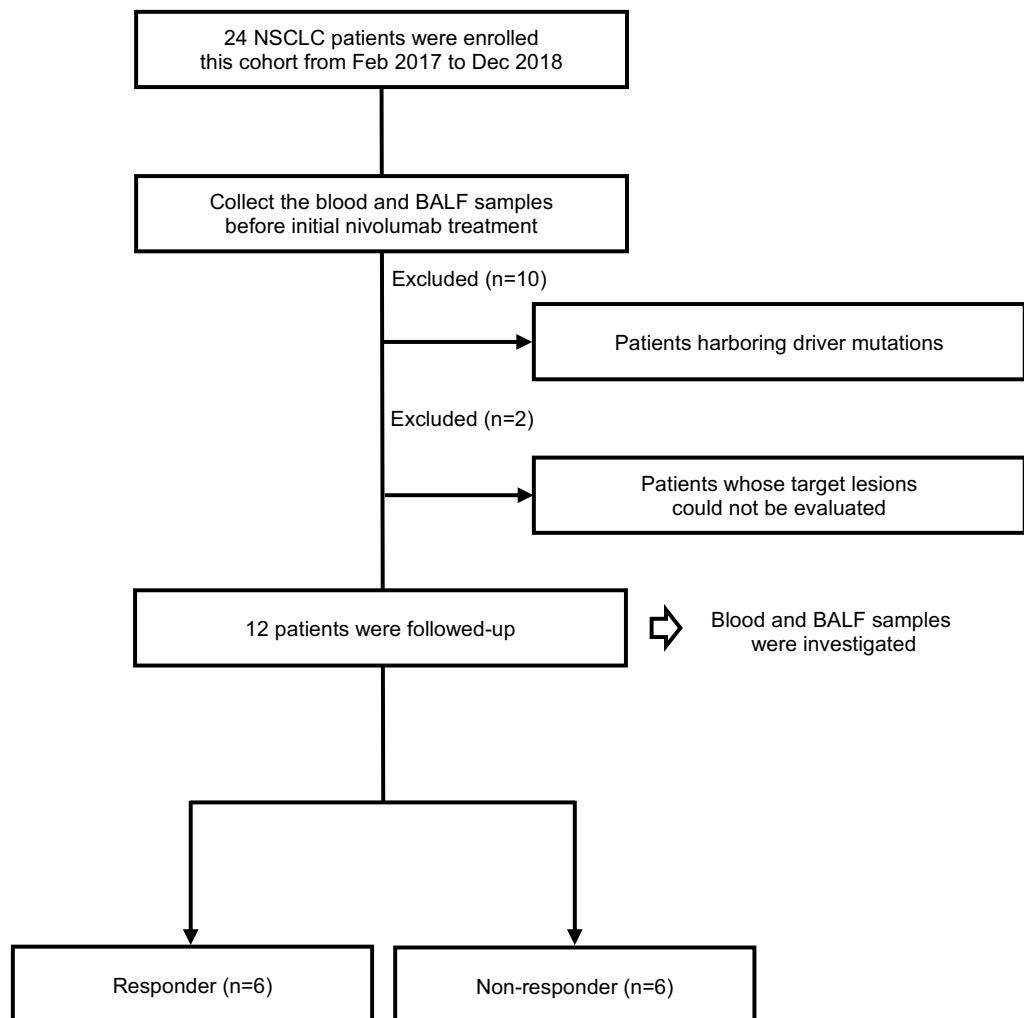

**Supplemental Figure 1. Diagram of patient disposition.**

Twenty-four NSCLC patients who started nivolumab treatment as second- or further-line treatment between February 2017 and December 2018 were enrolled in this cohort. Among these patients, 10 harboring driver mutations and 2 assessed as “not evaluable (NE)” were excluded. Finally, six patients with partial response (PR) or stable disease (SD) were assigned to the responder group, and the other six with progressive disease (PD) were assigned to the non-responder group.

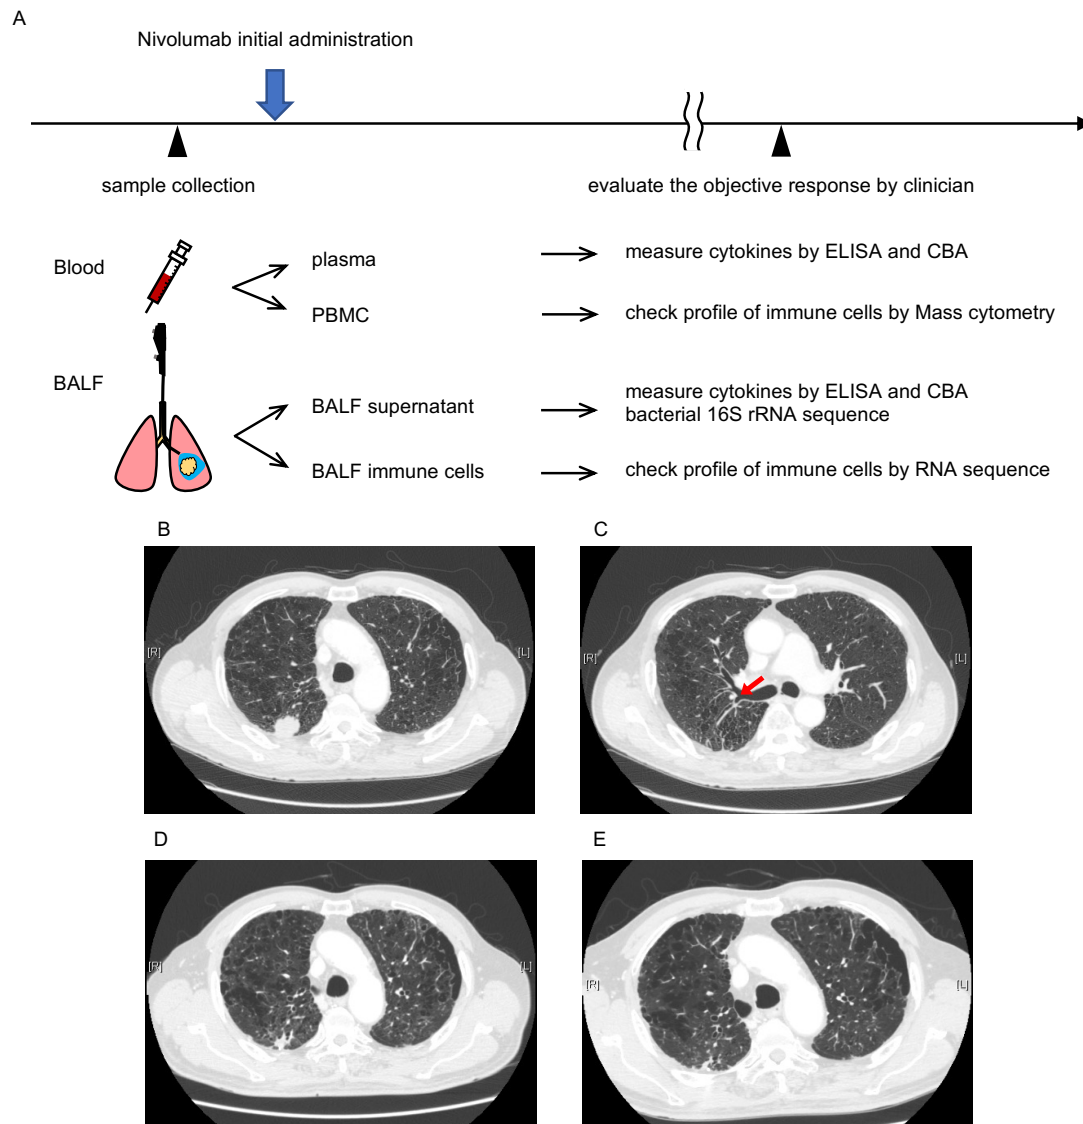

### Supplemental Figure 2. Study protocol.

(A) BALF and blood samples were collected before initial nivolumab administration. Cells and supernatant were isolated and stored at  $-80^{\circ}\text{C}$ . Immune profiles of BALF cells were analyzed by bulk RNA sequencing and blood cells were assessed using cytometry by time of flight (CyTOF). Cytokines in BALF supernatant and plasma were measured by ELISA and CBA. (B–E) Representative chest computed tomography images of a responder are shown. (B) The target tumor is located in the right upper lobe and is connected to right B<sup>2</sup>a. (C) BAL was performed in right B<sup>2</sup>a (red arrow). (D) Four months after nivolumab initiation. (E) Forty-five months after nivolumab initiation.

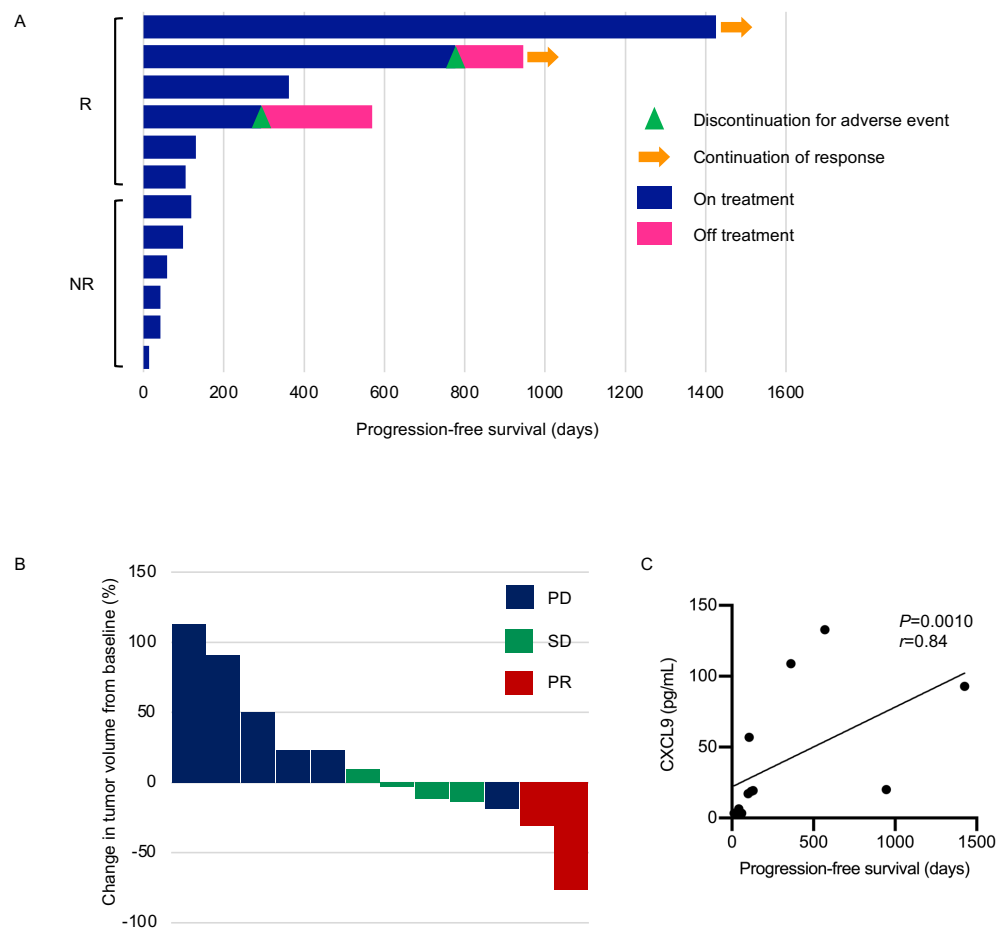

### Supplemental Figure 3. Clinical outcomes.

**(A)** Swimmer plot of progression-free survival of the 12 patients evaluated in this study. R corresponds to responders and NR to non-responders. **(B)** Waterfall plot of percentage change in tumor volume from baseline. Tumor volumes were calculated based on the sum of the diameters of target lesions, including primary tumors and metastatic tumors, according to the RECIST criteria. Responders were defined as PR or SD, and non-responders as PD. Tumor volumes shrank in one non-responder (third from the right) but a new lesion appeared in the liver. **(C)** Correlation between CXCL9 levels in BALF and progression-free survival. Statistical analyses were performed using Spearman's correlation with two-tailed significance.  $r$ , Spearman's correlation coefficient.

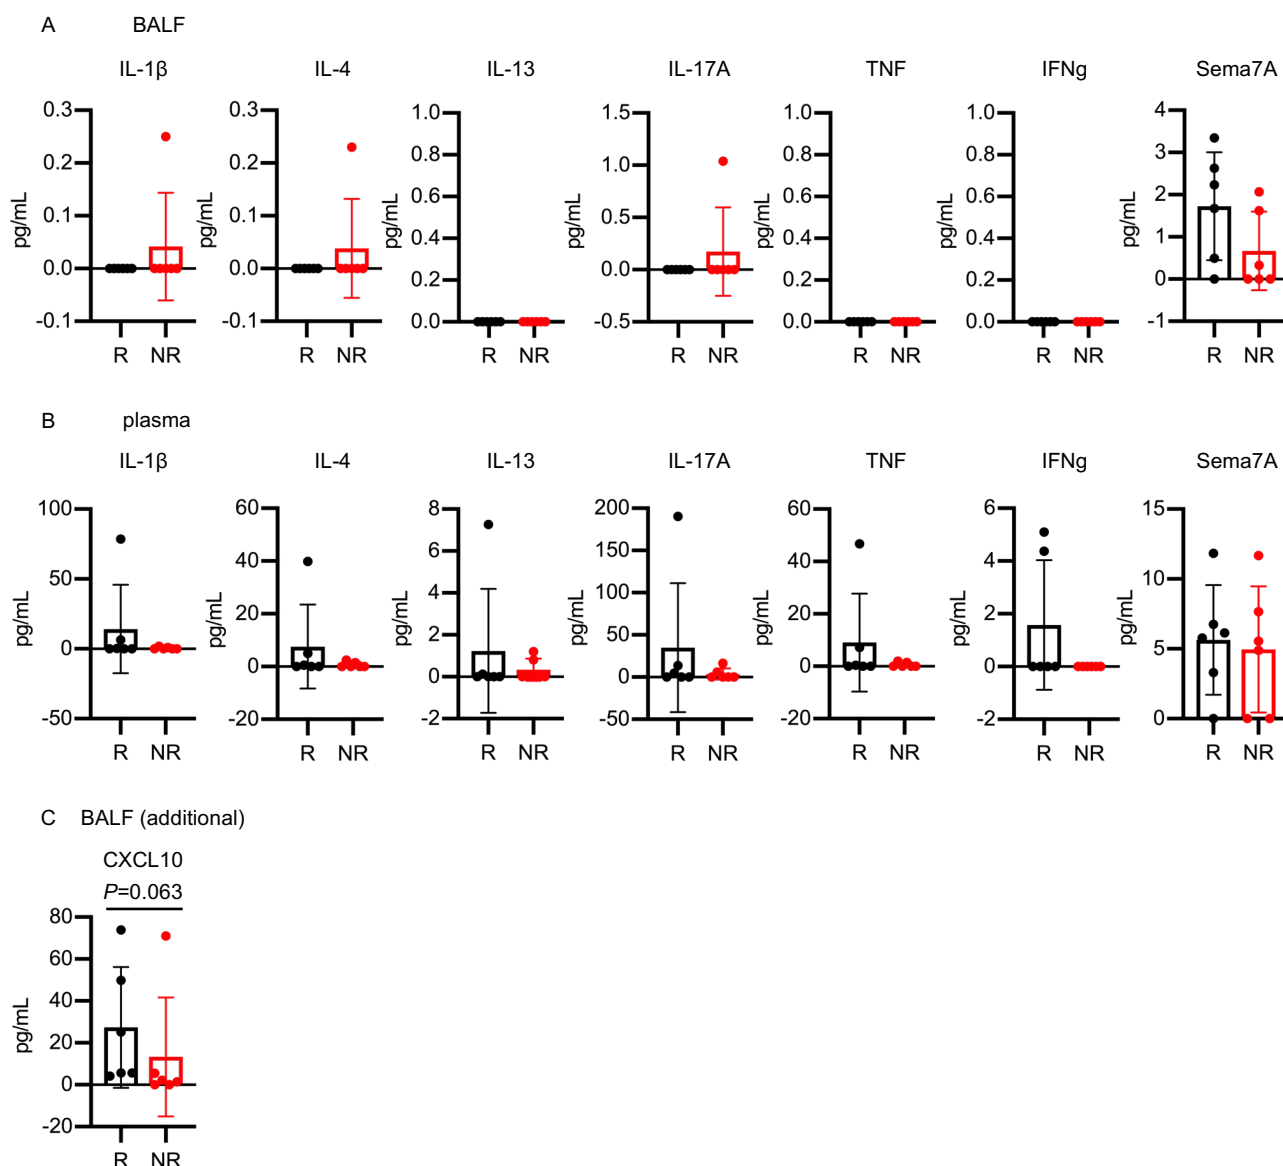

**Supplemental Figure 4. Cytokine levels in BALF and plasma.**

Cytokine levels in BALF (**A**) and plasma (**B**) were measured by ELISA or CBA and compared between responders (R: black) and non-responders (NR: red) before initial nivolumab treatment. (**C**) CXCL10 levels were measured after an additional freeze–thaw process. Data are presented as the mean  $\pm$  SEM. There was no significant difference between the two groups. Statistical analyses were performed by the Mann-Whitney U test.

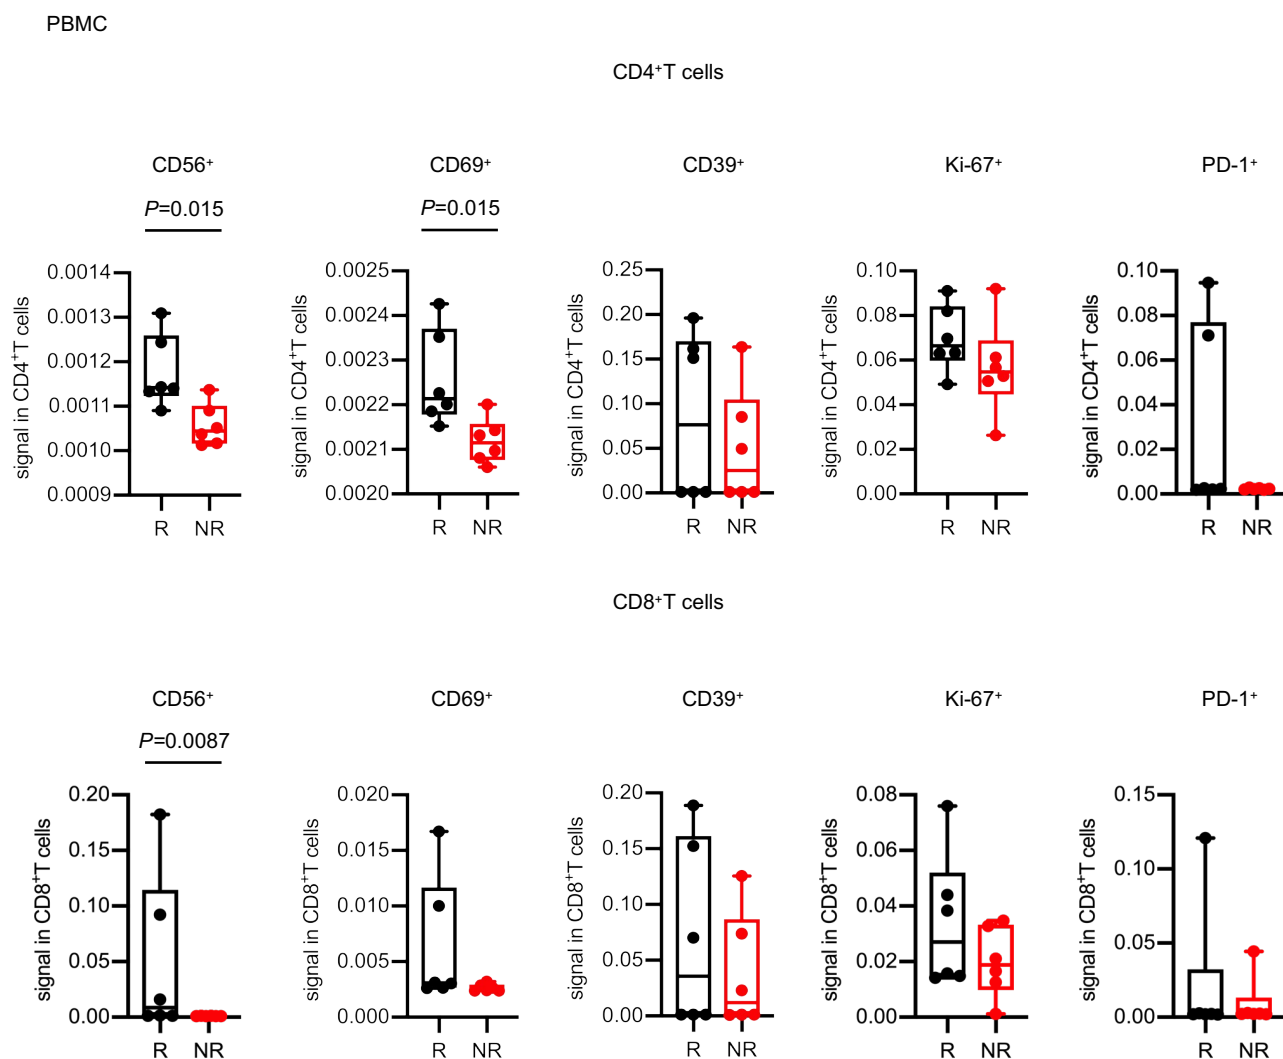

**Supplemental Figure 5. Representative markers of CD4<sup>+</sup> T cells and CD8<sup>+</sup> T cells in PBMCs.**

Comparison of immune cell profiles (the panel is shown in Supplemental Table 1) in peripheral blood mononuclear cells (PBMCs) between responders (R: black) and non-responders (NR: red) before initial nivolumab treatment. Profiles were assessed by CyTOF. The representative data shown indicate significant differences between the two groups. Data are presented as the mean  $\pm$  SEM. Statistical significance was determined by the Mann-Whitney U test.

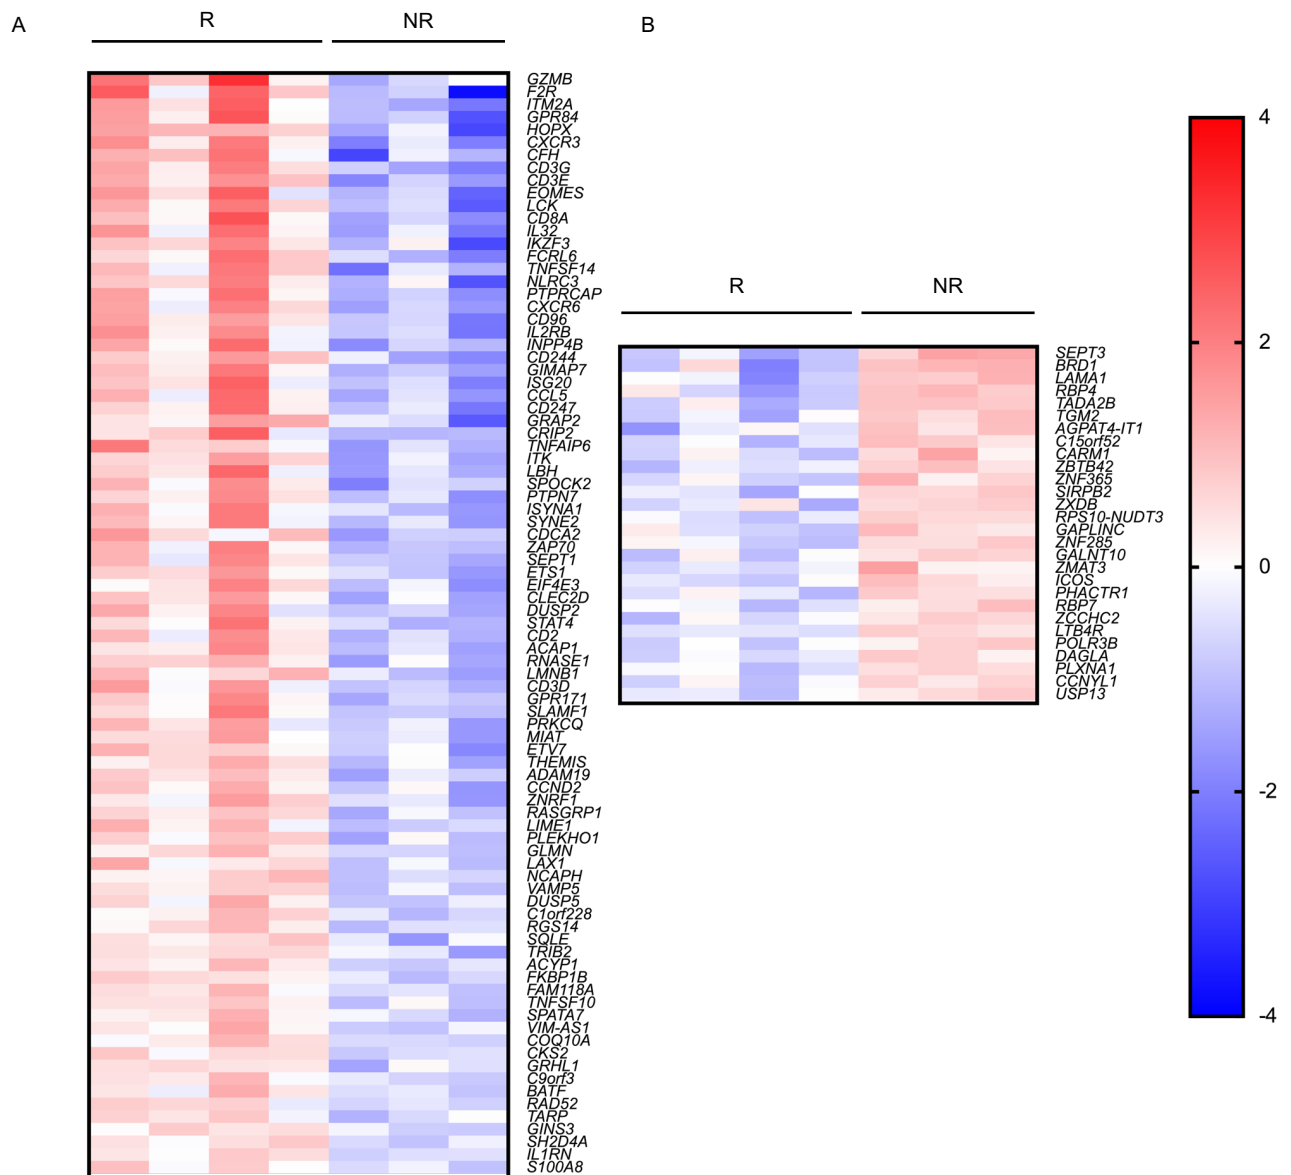

**Supplemental Figure 6. Transcriptome profiling of BALF immune cells.**

The transcriptome profiles of bulk cells collected from BALF were compared between four responders and three non-responders. One hundred fifteen representative genes (normalized counts >10) that were significantly (Student's t-test,  $P < 0.05$ ) and differentially ( $\log_2$  fold change >2) expressed in seven paired samples are shown as a heatmap. Eighty-seven genes were upregulated (**A**) and 28 were downregulated (**B**) in responders.

A

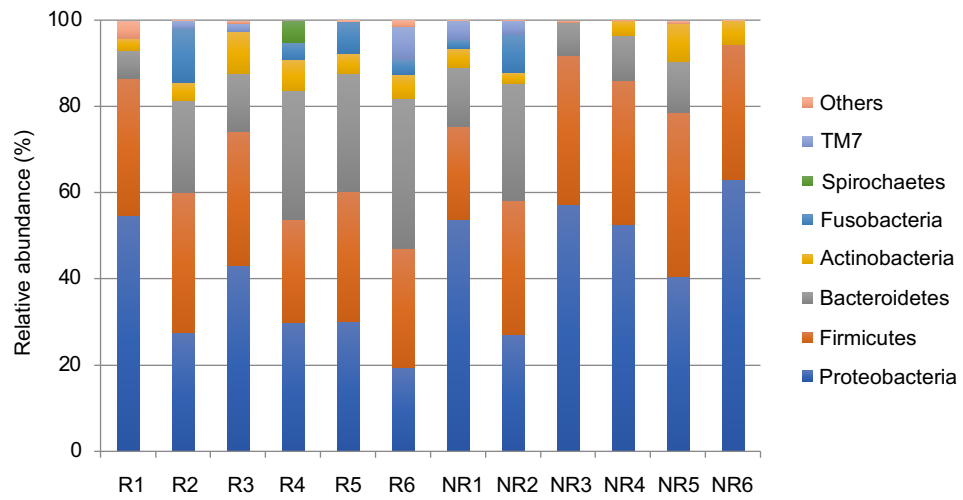

B

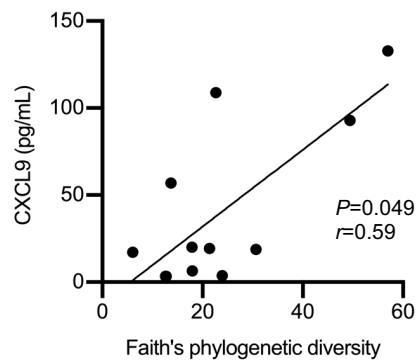

**Supplemental Figure 7. Respiratory microbial composition of BALF samples and correlation between BALF CXCL9 levels and bacterial diversity.**

**(A)** Respiratory microbial composition at the phylum level based on the relative abundance of operational taxonomic units (OTUs) for each BALF sample. R1–6 correspond to six responders and NR1–6 to six non-responders. **(B)** Correlation between CXCL9 levels and Faith's phylogenetic diversity in BALF.

Statistical analyses were performed using Spearman's correlation with two-tailed significance.  $r$ , Spearman's correlation coefficient.

A

CD8 staining

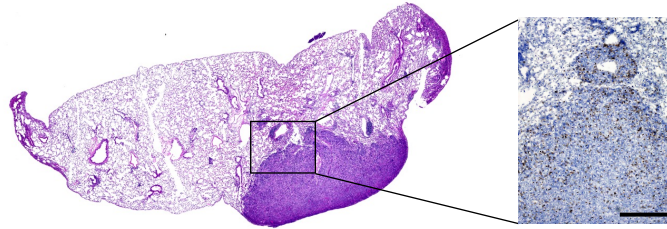

B

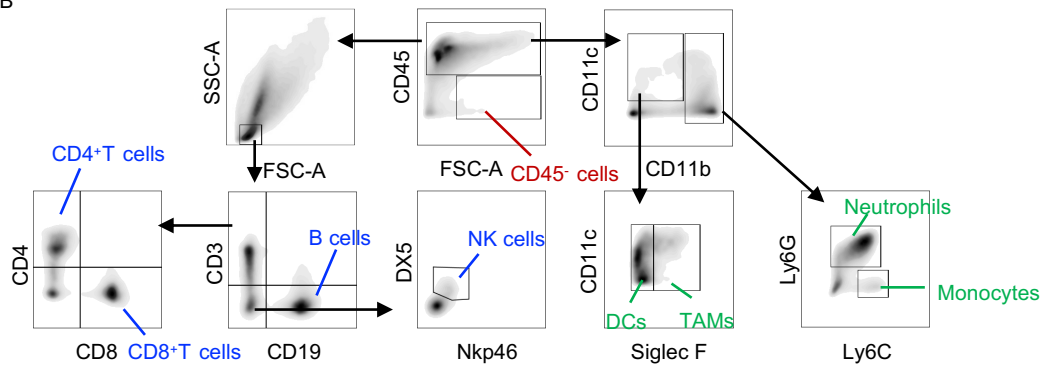

### Supplemental Figure 8. Establishment of an intrathoracic model with KP<sup>OVA</sup> cells.

KP<sup>OVA</sup> cells were inoculated intrathoracically into the left lung of each mouse. Representative images are shown. **(A)** H&E staining of lung tissue 2 weeks after KP<sup>OVA</sup> cell inoculation (left). Immunohistochemistry staining of CD8 (brown) in the tumor tissue. Magnification = 4x. Scale bar: 500  $\mu$ m (right). **(B)** Gating strategy for flow cytometry analysis to identify which cell populations secrete CXCL9 in the tumor microenvironment.

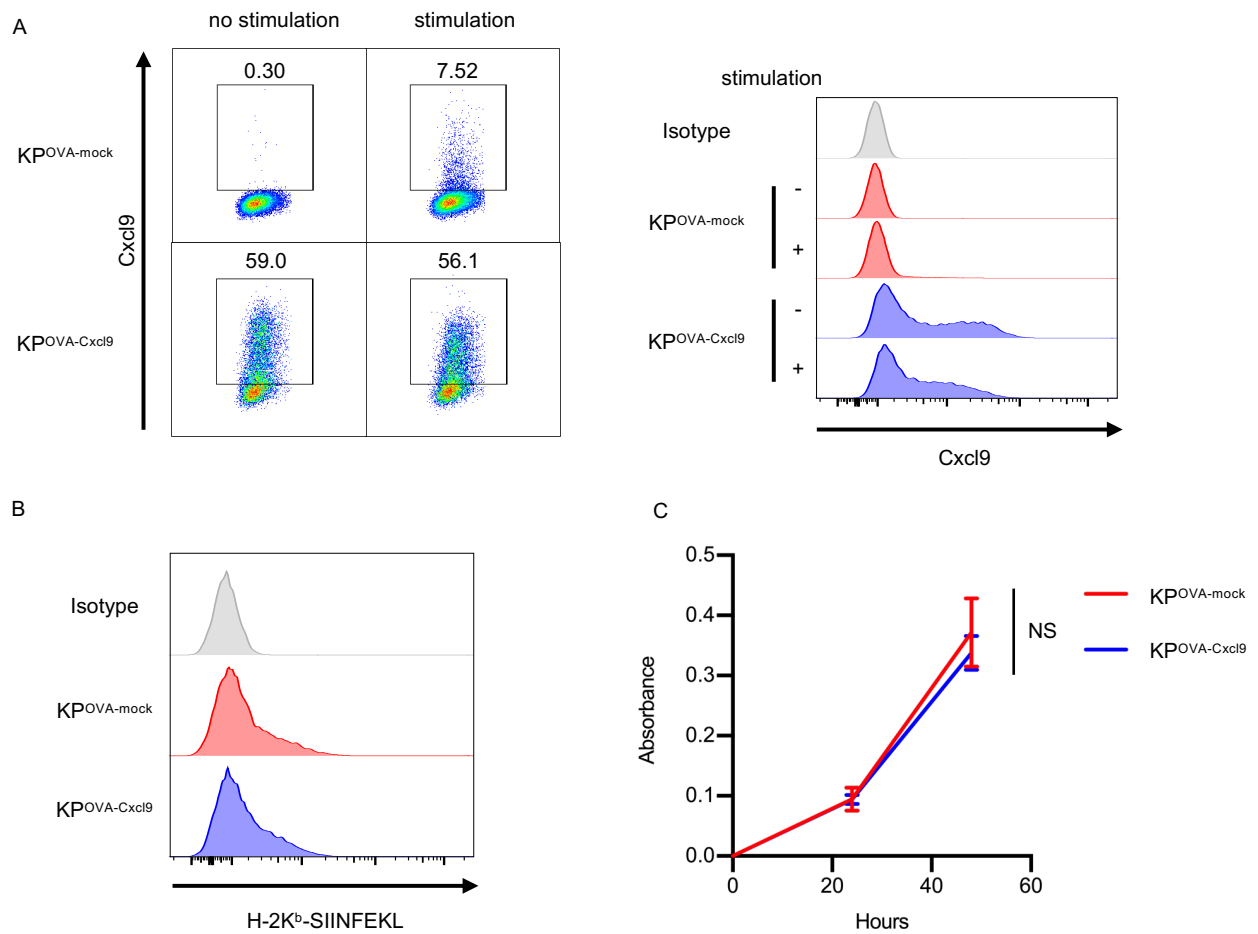

### Supplemental Figure 9. Establishment of overexpression of CXCL9 in KP<sup>OVA</sup> cells.

Flow cytometry analysis comparing KP<sup>OVA</sup>-mock and KP<sup>OVA</sup>-Cxcl9 with or without stimulation (**A**) and with H-2K<sup>b</sup>-SIINFEKL induction by IFN- $\gamma$  (**B**). (**C**) Cell proliferation rates were compared between KP<sup>OVA</sup>-mock (red) and KP<sup>OVA</sup>-Cxcl9 (blue) for 48 hours. Data are presented as the mean  $\pm$  SD. Statistical significance determined by Student's t-test. NS, not significant (n = 6/group).

**Supplemental Table 1. List of antibodies (human) used in CyTOF analysis.**

| Antibody                          | Clone      | Manufacturer    |
|-----------------------------------|------------|-----------------|
| Anti-Human CD45-Maxpar®Ready      | HI30       | BioLegend       |
| Anti-Human CD19-142Nd             | HIB19      | Fluidigm        |
| Anti-Human CD69-144Nd             | FN50       | Fluidigm        |
| Anti-Human CD138-145Nd            | DL-101     | Fluidigm        |
| Anti-Human CD8a-146Nd             | RPA-T8     | Fluidigm        |
| Anti-Human CD11c-147Sm            | Bu15       | Fluidigm        |
| Anti-Human CD16-Maxpar®Ready      | 3G8        | BioLegend       |
| Anti-Human CD25-149Sm             | 2A3        | Fluidigm        |
| Anti-Human CD86-150Nd             | IT2.2      | Fluidigm        |
| Anti-Human CD39 (ENTPD1)          | 498403     | R&D Systems     |
| Anti-Human CD185 (CXCR5)-153Eu    | RF8B2      | Fluidigm        |
| Anti-Human CD279 (PD-1)-155Gd     | EH12.2H7   | Fluidigm        |
| Anti-Human CD183 (CXCR3)-156Gd    | G025H7     | Fluidigm        |
| Anti-Human CD194 (CCR4)-158Gd     | L291H4     | Fluidigm        |
| Anti-Human CD197 (CCR7)-159Tb     | G043H7     | Fluidigm        |
| Anti-Human CD28-160Gd             | 28.2       | Fluidigm        |
| Anti-Human CD152 (CTLA-4)-161Dy   | 14D3       | Fluidigm        |
| Anti-Human CD122 (IL-2R $\beta$ ) | 27302      | R&D Systems     |
| Anti-Human CD56-161Dy             | NCAM16.2   | Fluidigm        |
| Anti-Human Sema7A                 | 310829     | R&D Systems     |
| Anti-PE-165Ho                     | PE001      | Fluidigm        |
| Anti-Human Foxp3-PE               | 236A/E7    | eBioscience     |
| Anti-Human Sema4A                 | 741509     | R&D Systems     |
| Anti-Human CD27-Maxpar®Ready      | O323       | BioLegend       |
| Anti-Human Ki-67-168Er            | Ki-67      | Fluidigm        |
| Anti-Human CD45RA-169Tm           | HI100      | Fluidigm        |
| Anti-Human CD3-170Er              | UCHT1      | Fluidigm        |
| Anti-Human CD141 (Thrombomodulin) | 501733     | R&D Systems     |
| Anti-Human CD134 (OX40)           | 977974     | R&D Systems     |
| Anti-Human HLA-DR-173Yb           | L243       | Fluidigm        |
| Anti-Human CD4-174Yb              | SK3        | Fluidigm        |
| Anti-Rabbit-175Lu                 | polyclonal | Fluidigm        |
| Anti-Sema6D                       | polyclonal | R&D systems     |
| Anti-Human CD11b-209Bi            | ICRF44     | Fluidigm        |
| FcR Blocking Reagent, human       | –          | Miltenyi Biotec |

**Supplemental Table 2. Significantly upregulated genes in BALF cells of responders compared to non-responders.**

| Gene name       | Fold change ratio | P value | Gene name      | Fold change ratio | P value |
|-----------------|-------------------|---------|----------------|-------------------|---------|
| <i>GZMB</i>     | 13.82             | 0.032   | <i>SPOCK2</i>  | 3.63              | 0.033   |
| <i>F2R</i>      | 9.62              | 0.034   | <i>PTPN7</i>   | 3.60              | 0.020   |
| <i>ITM2A</i>    | 6.28              | 0.015   | <i>ISYNA1</i>  | 3.54              | 0.049   |
| <i>GPR84</i>    | 6.12              | 0.032   | <i>SYNE2</i>   | 3.52              | 0.046   |
| <i>HOPX</i>     | 6.10              | 0.012   | <i>CDCA2</i>   | 3.51              | 0.015   |
| <i>CXCR3</i>    | 5.78              | 0.020   | <i>ZAP70</i>   | 3.49              | 0.031   |
| <i>CFH</i>      | 5.68              | 0.034   | <i>SEPT1</i>   | 3.47              | 0.029   |
| <i>CD3G</i>     | 5.43              | 0.008   | <i>ETS1</i>    | 3.41              | 0.013   |
| <i>CD3E</i>     | 5.43              | 0.004   | <i>EIF4E3</i>  | 3.38              | 0.038   |
| <i>EOMES</i>    | 5.43              | 0.041   | <i>CLEC2D</i>  | 3.36              | 0.024   |
| <i>LCK</i>      | 5.26              | 0.022   | <i>DUSP2</i>   | 3.34              | 0.048   |
| <i>CD8A</i>     | 4.85              | 0.033   | <i>STAT4</i>   | 3.33              | 0.037   |
| <i>IL32</i>     | 4.79              | 0.045   | <i>CD2</i>     | 3.30              | 0.031   |
| <i>IKZF3</i>    | 4.76              | 0.045   | <i>ACAP1</i>   | 3.28              | 0.023   |
| <i>FCRL6</i>    | 4.64              | 0.020   | <i>RNASE1</i>  | 3.24              | 0.018   |
| <i>TNFSF14</i>  | 4.62              | 0.030   | <i>LMNB1</i>   | 3.22              | 0.014   |
| <i>NLRC3</i>    | 4.60              | 0.044   | <i>CD3D</i>    | 3.21              | 0.043   |
| <i>PTPRCAP</i>  | 4.58              | 0.026   | <i>GPR171</i>  | 3.17              | 0.028   |
| <i>CXCR6</i>    | 4.50              | 0.019   | <i>SLAMF1</i>  | 3.09              | 0.037   |
| <i>CD96</i>     | 4.40              | 0.012   | <i>PRKCQ</i>   | 2.95              | 0.049   |
| <i>IL2RB</i>    | 4.27              | 0.036   | <i>MIAT</i>    | 2.94              | 0.028   |
| <i>INPP4B</i>   | 4.27              | 0.038   | <i>ETV7</i>    | 2.92              | 0.034   |
| <i>CD244</i>    | 4.22              | 0.011   | <i>THEMIS</i>  | 2.84              | 0.024   |
| <i>GIMAP7</i>   | 4.22              | 0.014   | <i>ADAM19</i>  | 2.81              | 0.009   |
| <i>ISG20</i>    | 4.12              | 0.047   | <i>CCND2</i>   | 2.72              | 0.048   |
| <i>CCL5</i>     | 4.09              | 0.044   | <i>ZNRF1</i>   | 2.72              | 0.045   |
| <i>CD247</i>    | 3.99              | 0.043   | <i>RASGRP1</i> | 2.71              | 0.010   |
| <i>GRAP2</i>    | 3.99              | 0.043   | <i>LIME1</i>   | 2.67              | 0.024   |
| <i>CRIP2</i>    | 3.89              | 0.041   | <i>PLEKHO1</i> | 2.66              | 0.031   |
| <i>TNFAIP6</i>  | 3.84              | 0.027   | <i>GLMN</i>    | 2.57              | 0.005   |
| <i>ITK</i>      | 3.76              | 0.010   | <i>LAX1</i>    | 2.44              | 0.037   |
| <i>LBH</i>      | 3.76              | 0.047   | <i>NCAPH</i>   | 2.44              | 0.008   |
| <i>VAMP5</i>    | 2.41              | 0.007   | <i>COQ10A</i>  | 2.16              | 0.016   |
| <i>DUSP5</i>    | 2.34              | 0.036   | <i>CKS2</i>    | 2.13              | 0.009   |
| <i>C1orf228</i> | 2.33              | 0.017   | <i>GRHL1</i>   | 2.11              | 0.033   |
| <i>RGS14</i>    | 2.33              | 0.013   | <i>C9orf3</i>  | 2.11              | 0.022   |
| <i>SQLE</i>     | 2.32              | 0.044   | <i>BATF</i>    | 2.07              | 0.050   |
| <i>TRIB2</i>    | 2.31              | 0.028   | <i>RAD52</i>   | 2.06              | 0.022   |
| <i>ACYP1</i>    | 2.25              | 0.008   | <i>TARP</i>    | 2.06              | 0.048   |
| <i>FKBP1B</i>   | 2.24              | 0.005   | <i>GINS3</i>   | 2.04              | 0.011   |
| <i>FAM118A</i>  | 2.23              | 0.019   | <i>SH2D4A</i>  | 2.03              | 0.014   |
| <i>TNFSF10</i>  | 2.23              | 0.024   | <i>IL1RN</i>   | 2.03              | 0.005   |
| <i>SPATA7</i>   | 2.20              | 0.036   | <i>S100A8</i>  | 2.02              | 0.041   |
| <i>VIM-AS1</i>  | 2.17              | 0.045   |                |                   |         |

**Supplemental Table 3. Significantly downregulated genes in BALF cells of responders compared to non-responders.**

| Gene name      | Fold change ratio | P value | Gene name          | Fold change ratio | P value |
|----------------|-------------------|---------|--------------------|-------------------|---------|
| <i>USP13</i>   | 2.00              | 0.021   | <i>RPS10-NUDT3</i> | 2.16              | 0.006   |
| <i>CCNYL1</i>  | 2.01              | 0.032   | <i>ZXDB</i>        | 2.22              | 0.045   |
| <i>PLXNA1</i>  | 2.02              | 0.021   | <i>SIRPB2</i>      | 2.32              | 0.022   |
| <i>DAGLA</i>   | 2.02              | 0.010   | <i>ZNF365</i>      | 2.37              | 0.021   |
| <i>POLR3B</i>  | 2.03              | 0.033   | <i>ZBTB42</i>      | 2.37              | 0.008   |
| <i>LTB4R</i>   | 2.04              | 0.000   | <i>CARM1</i>       | 2.38              | 0.036   |
| <i>ZCCHC2</i>  | 2.04              | 0.035   | <i>C15orf52</i>    | 2.48              | 0.013   |
| <i>RBP7</i>    | 2.06              | 0.031   | <i>AGPAT4-IT1</i>  | 2.58              | 0.038   |
| <i>PHACTR1</i> | 2.10              | 0.024   | <i>TGM2</i>        | 2.63              | 0.022   |
| <i>ICOS</i>    | 2.10              | 0.016   | <i>TADA2B</i>      | 2.95              | 0.011   |
| <i>ZMAT3</i>   | 2.11              | 0.041   | <i>RBP4</i>        | 3.12              | 0.020   |
| <i>GALNT10</i> | 2.11              | 0.049   | <i>LAMA1</i>       | 3.14              | 0.027   |
| <i>ZNF285</i>  | 2.13              | 0.026   | <i>BRD1</i>        | 3.81              | 0.029   |
| <i>GAPLINC</i> | 2.15              | 0.033   | <i>SEPT3</i>       | 4.04              | 0.003   |

**Supplemental Table 4. List of antibodies (mouse) used in flow cytometry analysis.**

| Antigen                                                     | Clone               | Fluorescence                | Manufacturer     |
|-------------------------------------------------------------|---------------------|-----------------------------|------------------|
| CD3e                                                        | 17A2<br>145-2C11    | APC/Cyanine7<br>PE/Cyanine7 | BioLegend        |
| CD4                                                         | GK1.5<br>RM4-5      | PE/Cyanine7<br>APC          | BioLegend        |
| CD8a                                                        | 53-6.7<br>KT15      | APC/Cyanine7<br>FITC        | BioLegend<br>MBL |
| CD45                                                        | 30-F11              | APC/Cyanine7                | BioLegend        |
| CD11b                                                       | M1/70               | PE/Cyanine7                 | BioLegend        |
| CD11c                                                       | N418                | Brilliant Violet 421        | BioLegend        |
| CD19                                                        | 6D5                 | Brilliant Violet 421        | BioLegend        |
| Ly-6C                                                       | HK1.4               | FITC                        | BioLegend        |
| Ly-6G                                                       | 1A8                 | PerCP/Cyanine5.5            | BioLegend        |
| CD49b (pan-NK cells)                                        | DX5                 | Alexa Fluor® 488            | BioLegend        |
| CD335 (Nkp46)                                               | 29A1.4              | PerCP/Cyanine5.5            | BioLegend        |
| Siglec-F                                                    | E50-2440            | Alexa Fluor® 647            | BD Biosciences   |
| CD183 (CXCR3)<br>Isotype                                    | CXCR3-173<br>HTK888 | PerCP/Cyanine5.5            | BioLegend        |
| CD279 (PD-1)<br>Isotype                                     | 29F.1A12<br>RTK2758 | APC                         | BioLegend        |
| CD69<br>Isotype                                             | H1.2F3<br>HTK888    | Brilliant Violet 421        | BioLegend        |
| CXCL9 (MIG)<br>Isotype                                      | MIG-2F5.5<br>HTK888 | PE                          | BioLegend        |
| T-Select H-2K <sup>b</sup> OVA Tetramer-SIINFEKL<br>Isotype | –                   | PE                          | MBL              |
| H-2K <sup>b</sup> bound to SIINFEKL<br>Isotype              | 25-D1.16<br>MOPC-21 | APC                         | BioLegend        |
